# Supplementary material for: Microfluidic measurement of intracellular mRNA with a molecular beacon probe towards point-of-care radiation triage
Source: Royal Society of Chemistry journal article supplement (doi:10.1039/d4sd00079j), 2024-01-01
Supplement: d4sd00079j1.pdf [file d4sd00079j1.pdf]

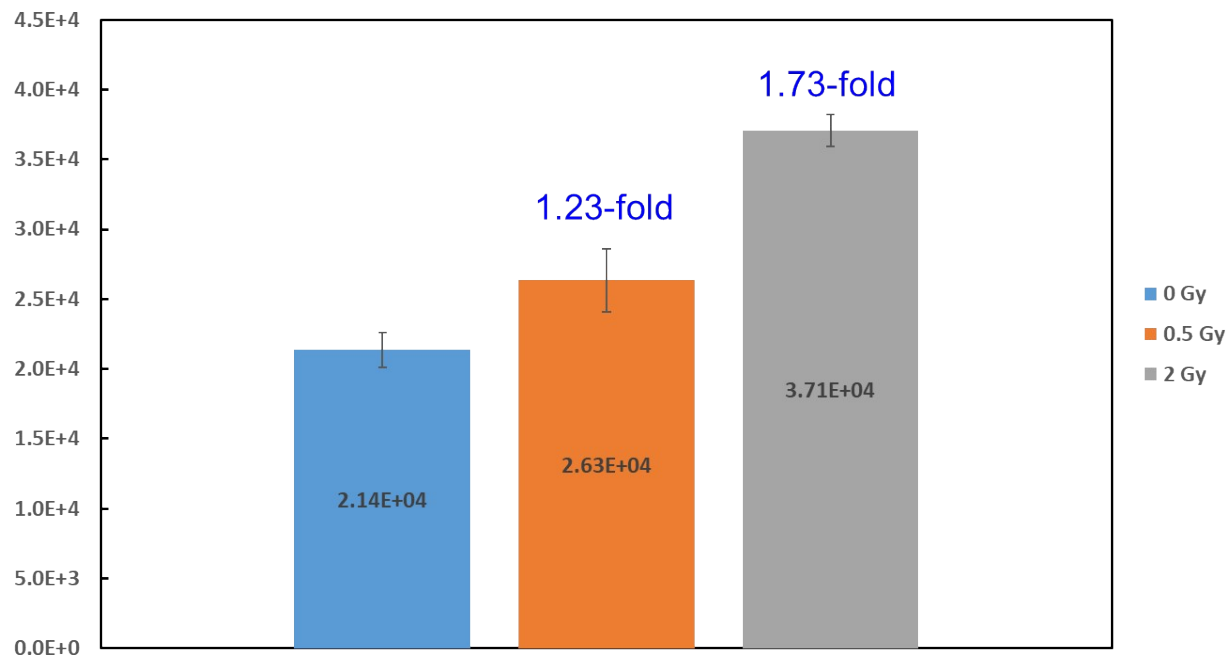

**Figure S1.** Dose-dependence Response of MB1 labeling with 24-h post-exposure incubation time in TK6 cells with a low dosage range.

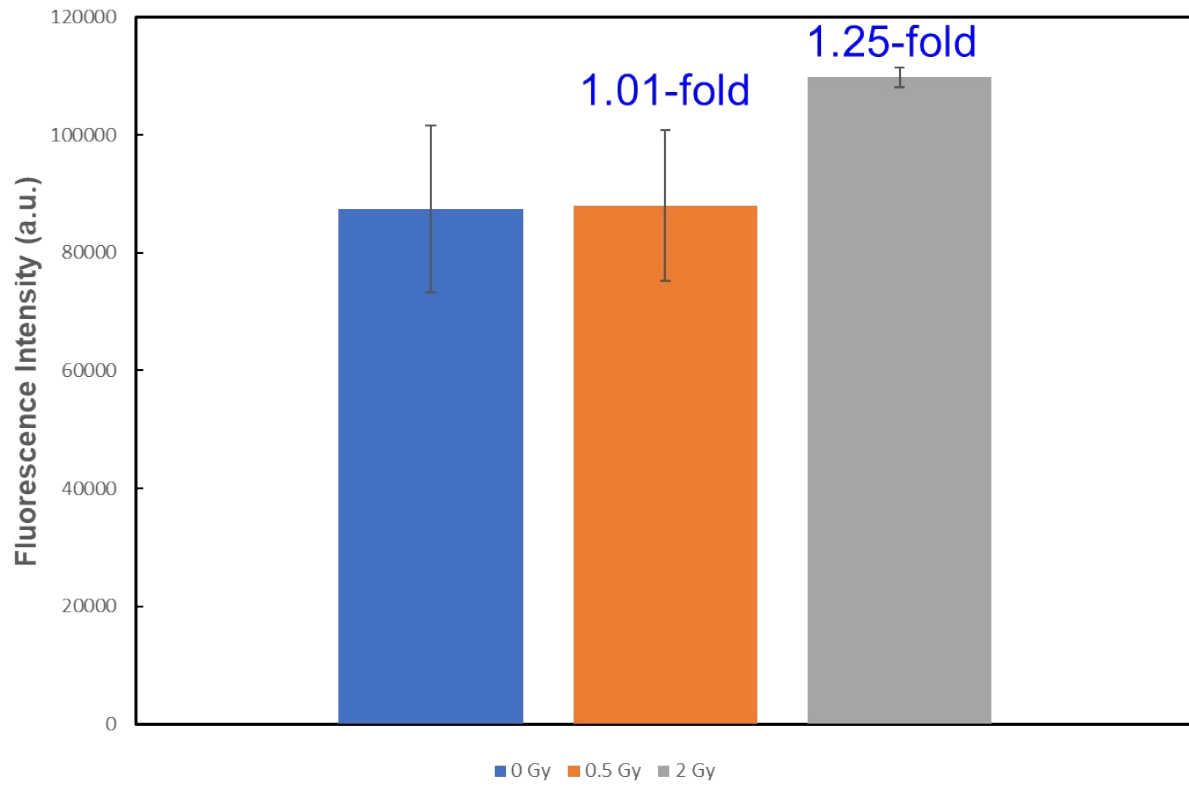

**Figure S2.** Dose-dependent Response of MB1 labeling with 24-h post-exposure incubation time in NH32 cells with a low dosage range.

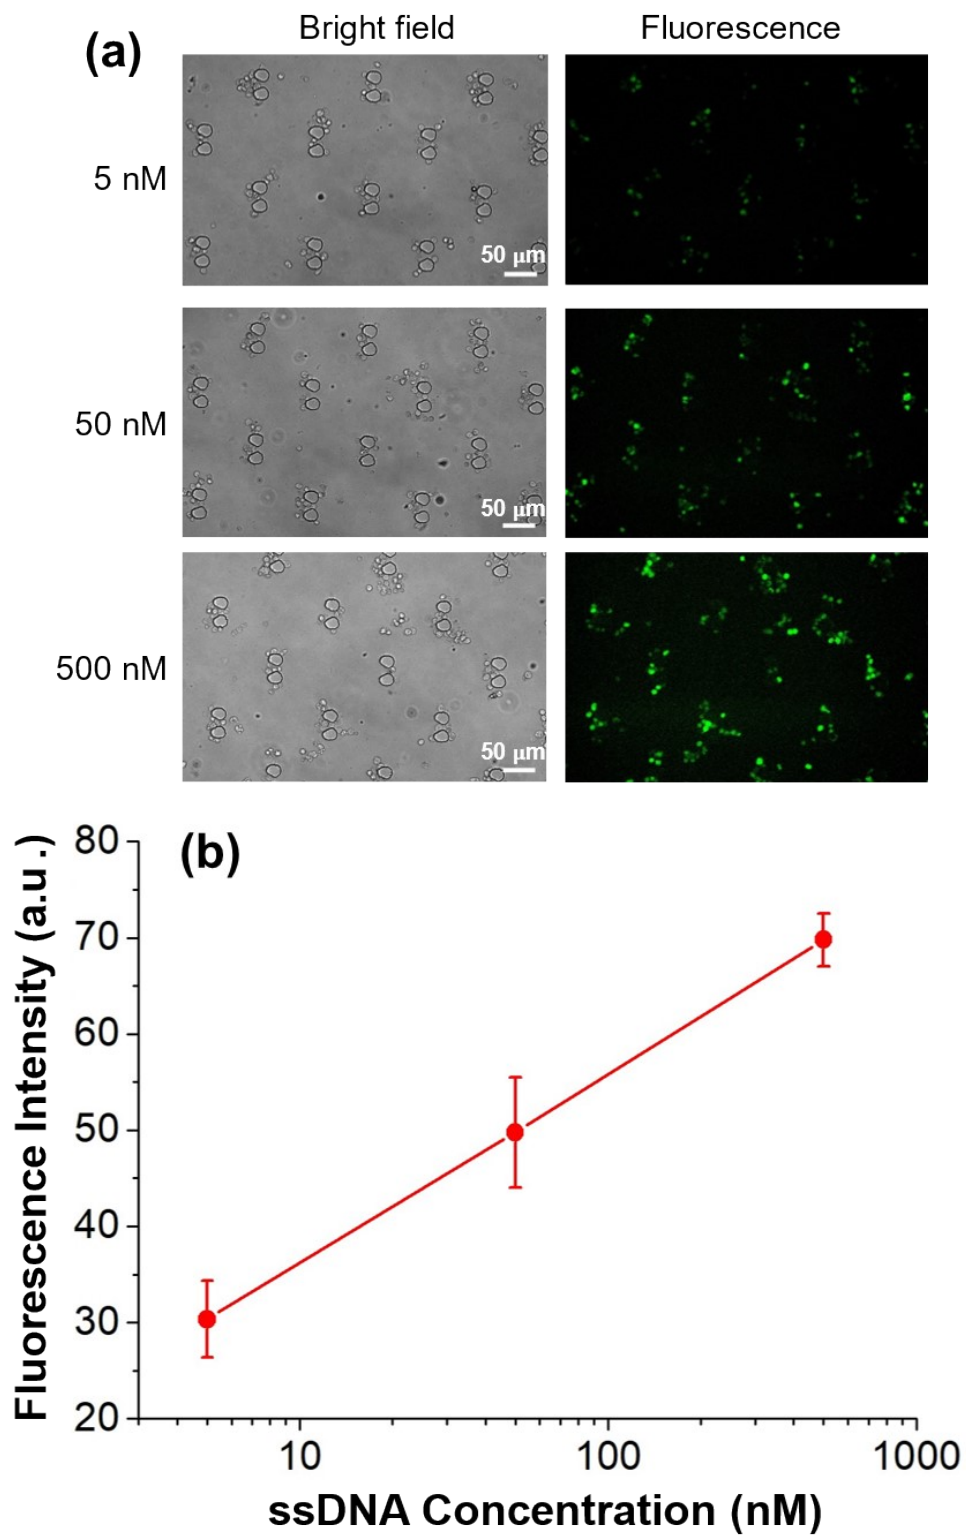

**Figure S3.** On-Chip Fluorescence-Concentration Correlation with Small Fluorescence Tag. (A) Fluorescent microscopy images. (B) Quantification of fluorescence.
